# Supplementary material
Source: PubMed Central journal article supplement (PMC4521598)
Supplement: NIHMS509408-supplement-supplemental_data.pdf [file NIHMS509408-supplement-supplemental_data.pdf]

## Supplemental Materials and Methods

**Description of human and murine tumor expression data.** Forty-two gene expression CEL files of human and murine xenograft tumors were analyzed. CEL files were generated from Affymetrix U133A2.0 gene array chips. Of the 42 CEL files, un-prefixed CEL files (CRC###.CEL, where ### is the tumor ID number) are original fresh frozen human tumors; CEL files prefixed with “PDCCE\_” are the fresh frozen mouse xenografts derived from their respective human tumors; and CEL files prefixed with “PDCCE\_FFPE\_” are the formalin-fixed paraffin-embedded mouse xenografts derived from their human tumors.

**Description of NCI-60 cell line expression data.** Fifty-nine NCI-60 cell line CEL files were obtained from the NCI-60 CellMiner repository (<http://discover.nci.nih.gov/cellminer/home.do>). We used the “RNA: Affymetrix HG-U133 44K probeset microarray” data set (Shankavaram et al., 2007) which contains CEL files generated from Affymetrix U133A and Affymetrix U133B gene array chips; however, only the U133A CEL files were relevant to our study.

**Preprocess of expression data.** RMA-estimated expression values are calculated using the bioconductor R package with the justRMA() function. The following pre-normalized expression matrices and descriptor text files are available as supplemental files:

- **Human\_Tumor\_RMA.txt** – CRC###.CEL files, RMA-normalized
- **PDCCE\_freshfrozen\_RMA.txt** – PDCCE\_CRC###.CEL files, RMA-normalized
- **PDCCE\_FFPE\_RMA.txt** – PDCCE\_FFPE\_CRC###.CEL files, RMA-normalized
- **PDCCE\_FFPE\_remCRC057\_RMA.txt** – PDCCE\_FFPE\_CRC###.CEL files with PDCCE\_FFPE\_CRC057.CEL removed for QC reasons, RMA-normalized
- **HT\_PDCCE\_FF\_RMA.txt** – CRC###.CEL files and PDCCE\_CRC###.CEL, RMA-normalized expression data, file merged and formatted for ComBat
- **RMA\_Batch\_Info.txt** – Batch information descriptor file for ComBat analysis
- **Adjusted\_HT\_PDCCE\_FF\_RMA.txt** – CRC###.CEL files and PDCCE\_CRC###.CEL, RMA-normalized expression data, ComBat normalized
- **Filtered\_Adjusted\_HT\_PDCCE\_FF\_RMA.txt** – CRC###.CEL files and PDCCE\_CRC###.CEL, RMA-normalized expression data, ComBat normalized and CV filtered
- **NCI60\_oxaliplatin\_sensitive.txt** – Oxaliplatin-sensitive training set consisting of expression data from 8 oxaliplatin-sensitive NCI-60 cell lines, RMA-normalized
- **NCI60\_oxaliplatin\_resistant.txt** – Oxaliplatin-resistant training set consisting of expression data from 8 oxaliplatin-resistant NCI-60 cell lines, RMA-normalized

The following R scripts are also available as supplemental files:

- **ComBat.R** is the unaltered ComBat batch normalization algorithm as downloaded from <http://jlab.byu.edu/ComBat/Download.html>. Detailed instructions on its usage are

described on the main ComBat webpage. All ComBat analysis should be performed using default parameters.

- **AllScripts.R** contains scripts for gene filtering (FilterData function), unsupervised hierarchical clustering (HCluster function), and application of the R package “pvclust” (pvcluster function). Specific comments on their usage are described in commented sections in the script prior to each function.

Scripts must be sourced in R prior to usage and may have specific external R library dependencies as described in their comments.

**Generating heatmaps and dendrograms.** To generate **Figure 2b and 2c**, we first performed ComBat on RMA-normalized human tumor samples file merged (<http://filemerger.genome.duke.edu/>) with fresh frozen PDCCE samples. File merging was used to align samples according to their Affymetrix probe IDs. Pre-normalized and merged expression values are provided as described above. Human samples are designated as batch 1, and PDCCE samples are designated as batch 2 in the batch info file. To perform ComBat, the following command can be executed in R using the provided ComBat script and tumor expression data:

```
> ComBat('HT_PDCCE_FF_RMA.txt', 'RMA_Batch_Info.txt', skip=1)
```

After ComBat has finished, the ComBat outputted expression matrix can be formatted for further analysis. The top label row requires being shifted to the right one cell, and the subsequent first column containing only ascending numbers should be deleted (this is a minor issue with the ComBat script). Affymetrix housekeeping probes should be removed prior to filtering probes. From here, the file can be saved as a tab-delimited text file and proceeded to filter probes based on coefficient of variation. Coefficient of variation (CV) filtering filters out the least variable probes according to the formula  $CV = (\text{standard deviation}) / (\text{mean})$ . We chose to filter out 80% of the least variable probes as determined by their CV values, such that  $CV > 0.8$  for each probe. The following command “FilterData” for CV filtering can be executed in R using the provided AllScripts script:

```
> FilterData('Adjusted_HT_PDCCE_FF_RMA.txt')
```

After filtering the ComBat expression data, we then proceeded to perform an unsupervised hierarchical cluster analysis to generate the heatmap in **Figure 2b** using pearson correlations and complete linkage. The following command “HCluster” for clustering and heatmap generation can be executed in R using the provided AllScripts script:

```
> HCluster('Filtered_Adjusted_HT_PDCCE_FF_RMA.txt')
```

To generate the dendrogram in **Figure 2c** and to calculate pvclust cluster AU and BP probabilities at 10,000 iterations, we used the following command “pvcluster” to calculate dendrogram cluster probabilities in R using the same pearson correlation and complete linkage as

in the previously generated heatmap with the provided AllScripts script (Note: this is a resource-intensive process that may take several hours depending on your computing power):

```
> pvcluster('Filtered_Adjusted_HT_PDCCE_FF_RMA.txt')
```

**Generating Oxaliplatin signature.** To generate the Oxaliplatin Sensitivity signature, NCI-60 cell line expression data must be generated. U133A CEL files for NCI-60 cell lines along with RMA-normalized NCI-60 gene expression data can be downloaded from CellMiner (<http://discover.nci.nih.gov/cellminer/loadDownload.do>). We chose to RMA-normalize the U133A CEL files for analysis.

After RMA-normalization, we performed quality assessment of the samples using 3D principle components (3DPCA) analysis in Matlab. Using 3DPCA, it was found that one sample, MCF-7, appeared to be an outlier as shown in **Supplementary Figure 1**. This sample was removed from subsequent analysis.

To determine phenotypes of oxaliplatin sensitivity, we obtained cancer screening dose response data from DTP (<http://dtp.nci.nih.gov/>) for oxaliplatin (NSC 266046). As described in the manuscript, phenotypes were determined as the 8 most sensitive and 8 most resistant NCI-60 cell lines according to GI50. Expression values of oxaliplatin response phenotypes used as training sets for the oxaliplatin sensitivity signature are provided as “nci60\_oxaliplatin\_sensitive.txt” and “nci60\_oxaliplatin\_resistant.txt”.

To generate the gene list for the signature, we uploaded the resistant (for “train0”) and sensitive (for “train1”) training sets to the CreateSignature module of the Duke GenePattern instance server (<https://genepattern.genome.duke.edu/gp/pages/login.jsf>), which is a Duke-written module to automate running the BinReg script in the GenePattern environment. Before running, relevant parameters were set as follows:

- version: 2
- num\_metagenes: 2
- apply\_quantile\_normalization: Yes
- apply\_shiftscale\_normalization: Yes
- burnin: 2000
- niter: 5000
- skips: 3

To determine the optimal number of genes for the signature (num\_genes), we ran the simulation from 50-200 genes in increments of 10 as described in the manuscript and compared leave-one-out performance for phenotype stability. Data from **Figure 1** was generated using 120 genes.

**Oxaliplatin signature validation.** To validate the Oxaliplatin Sensitivity signature on fresh frozen PDCCE and formalin-fixed paraffin-embedded PDCCE samples, we generated RMA-normalized data from each xenograft RNA extraction environment (PDCCE and PDCCE\_FFPE) separately. Pre-normalized expression values are provided as described above.

Because of the tendency of FFPE RNA to degrade during the fixation process, quality assessment of FFPE samples was performed by using 3DPCA as before. Using 3DPCA, it was found that one PDCCE FFPE sample, PDCCE\_FFPE\_CRC057.CEL, appeared to be an outlier as shown in **Supplementary Figure 2**. A box and whisker plot of the PDCCE FFPE samples supported this observation. This sample was removed from subsequent analysis, and the other PDCCE FFPE samples were RMA-normalized without this sample. These renormalized expression values are provided as described above.

To validate the oxaliplatin sensitivity signature on the fresh frozen PDCCE and formalin-fixed paraffin-embedded PDCCE samples, we uploaded the resistant NCI-60 oxaliplatin training set (for “train0”), the sensitive NCI-60 oxaliplatin training set (for “train1”), and both validation sets separately (PDCCE or PDCCE\_FFPE, for “test”) to the CreateSignature module of the Duke GenePattern instance server (<https://genepattern.genome.duke.edu/gp/pages/login.jsf>) in order to generate predicted probabilities for the validation samples. Before running, relevant parameters were set as follows:

- version: 2
- num\_genes: 120
- num\_metagenes: 2
- apply\_quantile\_normalization: Yes
- apply\_shiftscale\_normalization: Yes
- burnin: 2000
- niter: 5000
- skips: 3

Predicted probabilities of validation data sets were generated as XY scatter plot of predicted probability versus metagene score (predictions.png) and numerically as predicted probabilities (probabilities.txt). Pearson correlations of mouse TGI versus predicted probability of oxaliplatin sensitivity were calculated in Graphpad Prism using Correlation analysis. **Figure 3b** was generated using BinReg probabilities from the PDCCE validation data set. **Figure 3c** was generated using BinReg probabilities the PDCCE\_FFPE validation data set with CRC057 removed.

The following table summarizes the components of the BinReg model in terms of Affymetrix probesets, gene annotation, and posterior means of the Bayesian probit regression model, as determined by the MCMC parameters described above.

| Probeset    | Posterior Mean to the Regression Parameter | Gene Symbol | Gene Description                                                  |
|-------------|--------------------------------------------|-------------|-------------------------------------------------------------------|
| 200060_s_at | 0.012701                                   | RNPS1       | RNA binding protein S1, serine-rich domain                        |
| 200091_s_at | 0.018285                                   | RPS25       | ribosomal protein S25                                             |
| 200615_s_at | -0.023449                                  | AP2B1       | adaptor-related protein complex 2, beta 1 subunit                 |
| 200768_s_at | 0.011861                                   | MAT2A       | methionine adenosyltransferase II, alpha                          |
| 200787_s_at | -0.034132                                  | PEA15       | phosphoprotein enriched in astrocytes 15                          |
| 200788_s_at | -0.036282                                  | PEA15       | phosphoprotein enriched in astrocytes 15                          |
| 200859_x_at | -0.021852                                  | FLNA        | filamin A, alpha (actin binding protein 280)                      |
| 200878_at   | -0.035524                                  | EPAS1       | endothelial PAS domain protein 1                                  |
| 200885_at   | -0.033432                                  | RHOC        | ras homolog gene family, member C                                 |
| 201038_s_at | 0.018821                                   | ANP32A      | Acidic (leucine-rich) nuclear phosphoprotein 32 family            |
| 201051_at   | 0.014587                                   | ANP32A      | Acidic (leucine-rich) nuclear phosphoprotein 32 family            |
| 201108_s_at | -0.036206                                  | THBS1       | thrombospondin 1                                                  |
| 201109_s_at | -0.05787                                   | THBS1       | thrombospondin 1                                                  |
| 201110_s_at | -0.068315                                  | THBS1       | thrombospondin 1                                                  |
| 201162_at   | -0.038152                                  | IGFBP7      | insulin-like growth factor binding protein 7                      |
| 201163_s_at | -0.063467                                  | IGFBP7      | insulin-like growth factor binding protein 7                      |
| 201172_x_at | -0.011621                                  | ATP6V0E     | ATPase, H <sup>+</sup> transporting, lysosomal 9kDa, V0 subunit e |
| 201289_at   | -0.085481                                  | CYR61       | cysteine-rich, angiogenic inducer, 61                             |
| 201391_at   | 0.014042                                   | TRAP1       | TNF receptor-associated protein 1                                 |
| 201968_s_at | -0.019467                                  | PGM1        | phosphoglucomutase 1                                              |
| 201969_at   | 0.024789                                   | NASP        | nuclear autoantigenic sperm protein (histone-binding)             |
| 201984_s_at | -0.016938                                  | EGFR        | epidermal growth factor receptor                                  |
| 202107_s_at | 0.014657                                   | MCM2        | MCM2 minichromosome maintenance deficient 2, mitotin              |
| 202246_s_at | 0.008335                                   | CDK4        | cyclin-dependent kinase 4                                         |
| 202258_s_at | 0.009999                                   | PFAAP5      | phosphonoformate immuno-associated protein 5                      |

|             |           |          |                                                                                     |
|-------------|-----------|----------|-------------------------------------------------------------------------------------|
| 202377_at   | -0.029127 | ---      | ---                                                                                 |
| 202503_s_at | 0.014223  | KIAA0101 | KIAA0101                                                                            |
| 202551_s_at | -0.048592 | CRIM1    | cysteine rich transmembrane BMP regulator 1 (chordin-like)                          |
| 202552_s_at | -0.035816 | CRIM1    | cysteine rich transmembrane BMP regulator 1 (chordin-like)                          |
| 202566_s_at | -0.014421 | SVIL     | supervillin                                                                         |
| 202607_at   | -0.014346 | NDST1    | N-deacetylase/N-sulfotransferase (heparan glucosaminyl) 1                           |
| 202679_at   | -0.020945 | NPC1     | Niemann-Pick disease, type C1                                                       |
| 202822_at   | -0.027163 | LPP      | LIM domain containing preferred translocation partner in lipoma                     |
| 203104_at   | -0.007808 | CSF1R    | colony stimulating factor 1 receptor                                                |
| 203504_s_at | -0.025273 | ABCA1    | ATP-binding cassette, sub-family A (ABC1), member 1                                 |
| 203505_at   | -0.021747 | ABCA1    | ATP-binding cassette, sub-family A (ABC1), member 1                                 |
| 204036_at   | -0.026615 | EDG2     | endothelial differentiation, lysophosphatidic acid G-protein-coupled receptor, 2    |
| 204425_at   | 0.028924  | ARHGAP4  | Rho GTPase activating protein 4                                                     |
| 204489_s_at | -0.042092 | CD44     | CD44 molecule (Indian blood group)                                                  |
| 204647_at   | -0.029052 | HOMER3   | homer homolog 3 (Drosophila)                                                        |
| 204676_at   | 0.010861  | C16ORF51 | chromosome 16 open reading frame 51                                                 |
| 204688_at   | -0.04282  | SGCE     | sarcoglycan, epsilon                                                                |
| 204805_s_at | 0.012989  | H1FX     | H1 histone family, member X                                                         |
| 205129_at   | 0.013757  | NPM3     | nucleophosmin/nucleoplasmin, 3                                                      |
| 205743_at   | -0.012022 | STAC     | SH3 and cysteine rich domain                                                        |
| 205811_at   | 0.007325  | POLG2    | polymerase (DNA directed), gamma 2, accessory subunit                               |
| 206116_s_at | -0.040724 | TPM1     | tropomyosin 1 (alpha)                                                               |
| 207357_s_at | -0.022075 | GALNT10  | UDP-N-acetyl-alpha-D-galactosamine:polypeptide N-acetylgalactosaminyltransferase 10 |
| 208711_s_at | -0.027546 | CCND1    | cyclin D1                                                                           |
| 208773_s_at | 0.009103  | ANKHD1   | ankyrin repeat and KH domain containing 1                                           |
| 208924_at   | -0.02271  | RNF11    | ring finger protein 11                                                              |
| 208944_at   | -0.031149 | TGFBR2   | transforming growth factor, beta receptor II (70/80kDa)                             |

|             |           |         |                                                                          |
|-------------|-----------|---------|--------------------------------------------------------------------------|
| 208955_at   | 0.022795  | DUT     | dUTP pyrophosphatase                                                     |
| 209143_s_at | 0.012729  | CLNS1A  | chloride channel, nucleotide-sensitive, 1A                               |
| 209214_s_at | 0.012813  | EWSR1   | Ewing sarcoma breakpoint region 1                                        |
| 209528_s_at | 0.00667   | TELO2   | TEL2, telomere maintenance 2, homolog ( <i>S. cerevisiae</i> )           |
| 209834_at   | -0.01502  | CHST3   | carbohydrate (chondroitin 6) sulfotransferase 3                          |
| 209835_x_at | -0.048195 | CD44    | CD44 molecule (Indian blood group)                                       |
| 209897_s_at | -0.020236 | SLIT2   | slit homolog 2 ( <i>Drosophila</i> )                                     |
| 209946_at   | -0.035352 | VEGFC   | vascular endothelial growth factor C                                     |
| 210138_at   | -0.037848 | RGS20   | regulator of G-protein signalling 20                                     |
| 210416_s_at | 0.007938  | CHEK2   | CHK2 checkpoint homolog ( <i>S. pombe</i> )                              |
| 210445_at   | 0.011578  | FABP6   | fatty acid binding protein 6, ileal (gastrotropin)                       |
| 210764_s_at | -0.072264 | CYR61   | cysteine-rich, angiogenic inducer, 61                                    |
| 210916_s_at | -0.03891  | CD44    | CD44 molecule (Indian blood group)                                       |
| 210986_s_at | -0.057149 | TPM1    | tropomyosin 1 (alpha)                                                    |
| 210987_x_at | -0.041709 | TPM1    | tropomyosin 1 (alpha)                                                    |
| 211510_s_at | -0.003763 | CRHR2   | corticotropin releasing hormone receptor 2                               |
| 211612_s_at | -0.02027  | IL13RA1 | interleukin 13 receptor, alpha 1<br>/// interleukin 13 receptor, alpha 1 |
| 211668_s_at | -0.055531 | PLAU    | plasminogen activator, urokinase /// plasminogen activator, urokinase    |
| 211926_s_at | -0.025531 | MYH9    | myosin, heavy polypeptide 9, non-muscle                                  |
| 211971_s_at | 0.009539  | LRPPRC  | leucine-rich PPR-motif containing                                        |
| 212014_x_at | -0.046877 | CD44    | CD44 molecule (Indian blood group)                                       |
| 212061_at   | 0.012315  | SR140   | U2-associated SR140 protein                                              |
| 212298_at   | -0.047463 | NRP1    | neuropilin 1                                                             |
| 212315_s_at | 0.016992  | NUP210  | nucleoporin 210kDa                                                       |
| 212316_at   | 0.02634   | NUP210  | nucleoporin 210kDa                                                       |
| 212656_at   | 0.008187  | TSMF    | Ts translation elongation factor, mitochondrial                          |
| 212714_at   | 0.010496  | LARP4   | La ribonucleoprotein domain family, member 4                             |

|             |           |               |                                                             |
|-------------|-----------|---------------|-------------------------------------------------------------|
| 212962_at   | -0.007104 | SYDE1         | synapse defective 1, Rho GTPase, homolog 1 (C. elegans)     |
| 213798_s_at | -0.019111 | CAP1          | CAP, adenylate cyclase-associated protein 1 (yeast)         |
| 213947_s_at | 0.019042  | NUP210        | nucleoporin 210kDa                                          |
| 214030_at   | -0.004711 | DKFZP667G2110 | hypothetical protein DKFZp667G2110                          |
| 214060_at   | 0.011862  | SSBP1         | single-stranded DNA binding protein 1                       |
| 214752_x_at | -0.021732 | FLNA          | filamin A, alpha (actin binding protein 280)                |
| 214882_s_at | 0.015475  | SFRS2         | splicing factor, arginine/serine-rich 2                     |
| 215068_s_at | -0.014855 | FBXL18        | F-box and leucine-rich repeat protein 18                    |
| 215489_x_at | -0.028232 | HOMER3        | homer homolog 3 (Drosophila)                                |
| 215501_s_at | -0.013771 | DUSP10        | dual specificity phosphatase 10                             |
| 216515_x_at | 0.013513  | PTMA          | prothymosin, alpha (gene sequence 28)                       |
| 216538_at   | 0.008553  | EXOC4         | Exocyst complex component 4                                 |
| 216580_at   | 0.005455  | RPL7          | ribosomal protein L7                                        |
| 216908_x_at | 0.01551   | LOC94431      | RNA polymerase I transcription factor RRN3-like             |
| 217166_at   | 0.007509  | ---           | ---                                                         |
| 217340_at   | 0.005821  | LOC645452     | similar to 60S ribosomal protein L21                        |
| 217763_s_at | -0.045543 | RAB31         | RAB31, member RAS oncogene family                           |
| 217863_at   | 0.007136  | PIAS1         | protein inhibitor of activated STAT, 1                      |
| 217915_s_at | 0.01845   | C15ORF15      | chromosome 15 open reading frame 15                         |
| 217993_s_at | 0.007667  | MAT2B         | methionine adenosyltransferase II, beta                     |
| 218088_s_at | -0.013031 | RRAGC         | Ras-related GTP binding C                                   |
| 218456_at   | -0.027693 | C1QDC1        | C1q domain containing 1                                     |
| 218656_s_at | -0.021668 | LHFP          | lipoma HMGIC fusion partner                                 |
| 218718_at   | -0.075054 | PDGFC         | platelet derived growth factor C                            |
| 218768_at   | 0.006653  | NUP107        | nucleoporin 107kDa                                          |
| 218880_at   | -0.024006 | FOSL2         | FOS-like antigen 2                                          |
| 218980_at   | -0.016303 | FHOD3         | formin homology 2 domain containing 3                       |
| 219713_at   | 0.003583  | CARKL         | carbohydrate kinase-like                                    |
| 219733_s_at | 0.018246  | SLC27A5       | solute carrier family 27 (fatty acid transporter), member 5 |



|             |           |          |                                                                      |
|-------------|-----------|----------|----------------------------------------------------------------------|
| 220296_at   | -0.015467 | GALNT10  | UDP-N-acetyl-alpha-D-galactosamine                                   |
| 221224_s_at | 0.004925  | DCAKD    | dephospho-CoA kinase domain containing                               |
| 221534_at   | -0.011424 | C11ORF68 | chromosome 11 open reading frame 68                                  |
| 221563_at   | -0.022191 | DUSP10   | dual specificity phosphatase 10                                      |
| 221821_s_at | 0.010827  | C12ORF41 | chromosome 12 open reading frame 41                                  |
| 221843_s_at | -0.02271  | KIAA1609 | KIAA1609                                                             |
| 222036_s_at | 0.013709  | MCM4     | MCM4 minichromosome maintenance deficient 4 ( <i>S. cerevisiae</i> ) |
| 222040_at   | 0.016708  | HNRPA1   | heterogeneous nuclear ribonucleoprotein A1                           |
| 222222_s_at | -0.016202 | HOMER3   | homer homolog 3 ( <i>Drosophila</i> )                                |
| 222297_x_at | 0.005141  | RPL18    | Ribosomal protein L18                                                |
| 31874_at    | -0.02167  | GAS2L1   | growth arrest-specific 2 like 1                                      |
| 32094_at    | -0.010808 | CHST3    | carbohydrate (chondroitin 6) sulfotransferase 3                      |

**Software used for analysis.** The R statistical software package is available at [www.r-project.org](http://www.r-project.org). The Bioconductor R package is available at [www.bioconductor.org](http://www.bioconductor.org). ComBat is available as an R script at <http://jlab.byu.edu/ComBat/>. Matlab is a product of Mathworks (Natick, MA, USA) and is available at [www.mathworks.com/products/matlab/](http://www.mathworks.com/products/matlab/). Graphpad Prism is a product of Graphpad Software (La Jolla, CA, USA) and is available at [www.graphpad.com/prism/prism.htm](http://www.graphpad.com/prism/prism.htm). GenePattern is a genomic analysis platform developed by the Broad Institute (Cambridge, MA, USA), and custom Duke University GenePattern modules for Bayesian Binary Regression are available for use at <https://genepattern.genome.duke.edu/gp/pages/login.jsf>. All expression data and algorithms used are available at <https://www.cancer.duke.edu/caarray/home.action>.

## **Supplementary Figure Legends**

### **Supplementary Figure 1. Quality Control Omission of MCF7 in NCI-60 Oxaliplatin**

#### **Sensitivity Signature**

Fifty-nine samples from the NCI-60 cell panel were RMA normalized, and 3D principal components analysis was applied to the data set. The blue samples represent the resistant-classified cell lines in the oxaliplatin sensitivity signature. The red samples represent the sensitive-classified cell lines. The green sample represents MCF-7.

### **Supplementary Figure 2. Quality Control Omission of CRC057 in FFPE PDCCE Data Set**

A. The 14 formalin-fixed paraffin-embedded PDCCEs were arrayed and RMA normalized, Affymetrix housekeeping probes were removed, and a 3D principal components analysis was applied to the data set. The red sample represents CRC057.

B. Box and whisker plot generated from the RMA normalized data.

**Supplementary Figure 1 - Fifty-nine samples from the NCI-60 cell panel were RMA normalized and 3D principal components analysis was applied to the data set. Sample MCF7 was omitted based on PCA plot.**

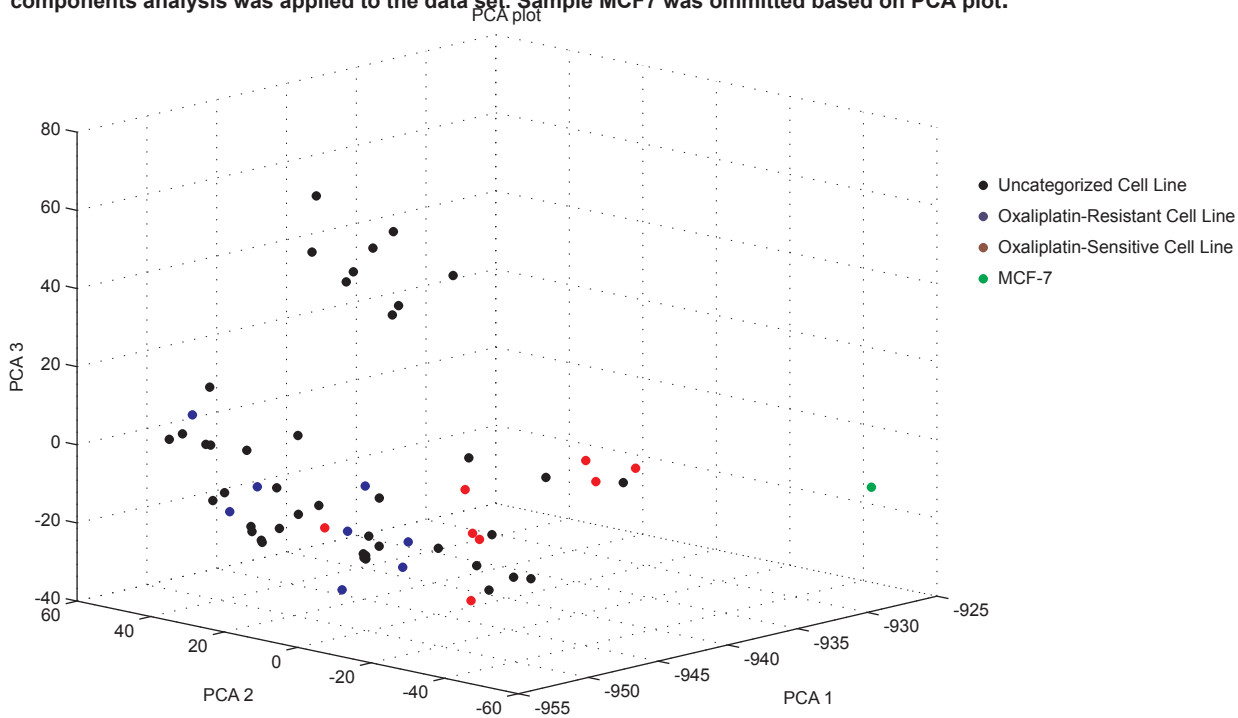

**A**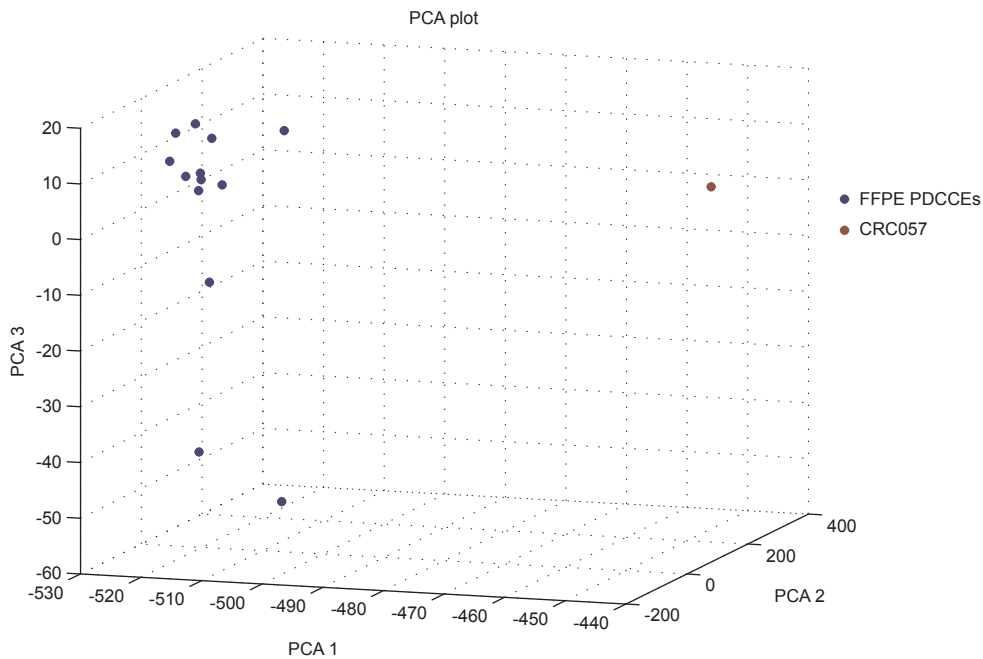**B**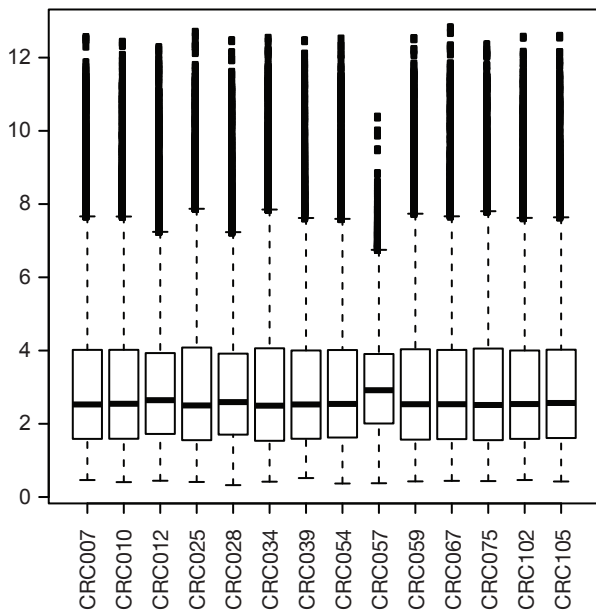

## Supplementary Tables

Supplementary Table 1. Complete DTP NCI-60 Oxaliplatin Treatment Data

| Cell Line <sup>a</sup> | Source                 | GI50 (μM) | TGI (μM) | LC50 (μM) |
|------------------------|------------------------|-----------|----------|-----------|
| ADR-RES                | Ovarian                | 0.03177   | 30.41    | 100       |
| SW-620                 | Colon                  | 0.04688   | 83.75    | 100       |
| RPMI-8226              | Leukemia               | 0.05272   | 91.20    | 100       |
| MOLT-4                 | Leukemia               | 0.1365    | 15.63    | 100       |
| HT29                   | Colon                  | 0.1754    | 8.241    | 72.44     |
| MCF7                   | Breast                 | 0.2244    | 6.637    | 100       |
| CCRF-CEM               | Leukemia               | 0.3499    | 100      | 100       |
| HCT-116                | Colon                  | 0.3784    | 100      | 100       |
| NCI-H460               | Non-Small Cell Lung    | 0.4355    | 38.28    | 100       |
| MDA-MB-435             | Melanoma               | 0.5768    | 18.62    | 48.19     |
| A549                   | Non-Small Cell Lung    | 0.6152    | 84.14    | 100       |
| HCC-2998               | Colon                  | 0.6180    | 10.02    | 61.24     |
| HCT-15                 | Colon                  | 0.6457    | 64.86    | 100       |
| OVCAR-5                | Ovarian                | 0.6714    | 21.23    | 100       |
| SR                     | Leukemia               | 0.6966    | 92.68    | 100       |
| 786-0                  | Renal                  | 0.7516    | 42.85    | 100       |
| CAKI-1                 | Renal                  | 0.7656    | 39.36    | 100       |
| K-562                  | Leukemia               | 0.8551    | 95.28    | 100       |
| LOX IMVI               | Melanoma               | 1.127     | 100      | 100       |
| SK-MEL-5               | Melanoma               | 1.138     | 17.66    | 74.47     |
| U251                   | Central Nervous System | 1.832     | 27.04    | 63.24     |
| IGROV1                 | Ovarian                | 1.849     | 35.89    | 100       |
| ACHN                   | Renal                  | 2.153     | 45.29    | 100       |
| UACC-62                | Melanoma               | 2.198     | 23.50    | 79.25     |

|           |                        |       |       |       |
|-----------|------------------------|-------|-------|-------|
| T-47D     | Breast                 | 2.213 | 100   | 100   |
| NCI-H226  | Non-Small Cell Lung    | 2.553 | 22.18 | 96.61 |
| SN12C     | Renal                  | 2.564 | 100   | 100   |
| SK-MEL-28 | Melanoma               | 2.624 | 37.67 | 100   |
| HL-60(TB) | Leukemia               | 2.831 | 100   | 100   |
| MALME-3M  | Melanoma               | 3.214 | 26.61 | 81.28 |
| NCI-H522  | Non-Small Cell Lung    | 3.926 | 32.36 | 100   |
| OVCAR-4   | Ovarian                | 4.093 | 83.75 | 100   |
| SF-268    | Central Nervous System | 4.121 | 100   | 100   |
| SF-295    | Central Nervous System | 4.710 | 100   | 100   |
| A498      | Renal                  | 4.853 | 32.66 | 87.90 |
| SK-MEL-2  | Melanoma               | 5.152 | 52.84 | 100   |
| OVCAR-3   | Ovarian                | 5.702 | 41.69 | 100   |
| OVCAR-8   | Ovarian                | 5.998 | 100   | 100   |
| DU-145    | Prostate               | 6.166 | 100   | 100   |
| M14       | Melanoma               | 7.211 | 45.08 | 100   |
| COLO 205  | Colon                  | 7.727 | 74.82 | 100   |
| RXF 393   | Renal                  | 8.128 | 39.72 | 98.63 |
| UO-31     | Renal                  | 8.472 | 43.65 | 92.47 |
| SNB-19    | Central Nervous System | 9.840 | 100   | 100   |
| SF-539    | Central Nervous System | 10.05 | 83.75 | 100   |
| UACC-257  | Melanoma               | 10.72 | 81.10 | 100   |
| KM12      | Colon                  | 10.91 | 100   | 100   |
| BT-549    | Breast                 | 12.33 | 100   | 100   |
| PC-3      | Prostate               | 17.86 | 100   | 100   |
| SNB-75    | Central Nervous System | 18.45 | 100   | 100   |
| TK-10     | Renal                  | 21.18 | 73.96 | 100   |

|            |                     |       |       |     |
|------------|---------------------|-------|-------|-----|
| HOP-92     | Non-Small Cell Lung | 25.47 | 73.96 | 100 |
| NCI-H322M  | Non-Small Cell Lung | 35.32 | 100   | 100 |
| HOP-62     | Non-Small Cell Lung | 46.13 | 100   | 100 |
| SK-OV-3    | Ovarian             | 66.22 | 100   | 100 |
| EKVX       | Non-Small Cell Lung | 88.72 | 100   | 100 |
| MDA-MB-231 | Breast              | 100   | 100   | 100 |
| HS 578T    | Breast              | 100   | 100   | 100 |

<sup>a</sup>There was no available data for the NCI-60 cell line MDA-N.

Supplementary Table 2. Gene List of NCI60-Derived Oxaliplatin Sensitivity Signature

| Probe Set ID | Gene Symbol | Gene Title                                                                                         |
|--------------|-------------|----------------------------------------------------------------------------------------------------|
| 200060_s_at  | RNPS1       | RNA binding protein S1, serine-rich domain /// RNA binding protein S1, serine-rich domain          |
| 200091_s_at  | RPS25       | ribosomal protein S25 /// ribosomal protein S25                                                    |
| 200615_s_at  | AP2B1       | adaptor-related protein complex 2, beta 1 subunit                                                  |
| 200768_s_at  | MAT2A       | methionine adenosyltransferase II, alpha                                                           |
| 200787_s_at  | PEA15       | phosphoprotein enriched in astrocytes 15                                                           |
| 200788_s_at  | PEA15       | phosphoprotein enriched in astrocytes 15                                                           |
| 200859_x_at  | FLNA        | filamin A, alpha (actin binding protein 280)                                                       |
| 200878_at    | EPAS1       | endothelial PAS domain protein 1                                                                   |
| 200885_at    | RHOC        | ras homolog gene family, member C                                                                  |
| 201038_s_at  | ANP32A      | Acidic (leucine-rich) nuclear phosphoprotein 32 family, member A                                   |
| 201051_at    | ANP32A      | Acidic (leucine-rich) nuclear phosphoprotein 32 family, member A                                   |
| 201108_s_at  | THBS1       | thrombospondin 1                                                                                   |
| 201109_s_at  | THBS1       | thrombospondin 1                                                                                   |
| 201110_s_at  | THBS1       | thrombospondin 1                                                                                   |
| 201162_at    | IGFBP7      | insulin-like growth factor binding protein 7                                                       |
| 201163_s_at  | IGFBP7      | insulin-like growth factor binding protein 7                                                       |
| 201172_x_at  | ATP6V0E     | ATPase, H <sup>+</sup> transporting, lysosomal 9kDa, V0 subunit e                                  |
| 201289_at    | CYR61       | cysteine-rich, angiogenic inducer, 61                                                              |
| 201391_at    | TRAP1       | TNF receptor-associated protein 1                                                                  |
| 201968_s_at  | PGM1        | phosphoglucomutase 1                                                                               |
| 201969_at    | NASP        | nuclear autoantigenic sperm protein (histone-binding)                                              |
| 201984_s_at  | EGFR        | epidermal growth factor receptor (erythroblastic leukemia viral (v-erb-b) oncogene homolog, avian) |
| 202107_s_at  | MCM2        | MCM2 minichromosome maintenance deficient 2, mitotin (S.                                           |



|             |          |                                                                                                                                                                                                                   |
|-------------|----------|-------------------------------------------------------------------------------------------------------------------------------------------------------------------------------------------------------------------|
|             |          | cerevisiae)                                                                                                                                                                                                       |
| 202246_s_at | CDK4     | cyclin-dependent kinase 4                                                                                                                                                                                         |
| 202258_s_at | PFAAP5   | phosphonoformate immuno-associated protein 5                                                                                                                                                                      |
| 202377_at   | ---      | ---                                                                                                                                                                                                               |
| 202503_s_at | KIAA0101 | KIAA0101                                                                                                                                                                                                          |
| 202551_s_at | CRIM1    | cysteine rich transmembrane BMP regulator 1 (chordin-like)                                                                                                                                                        |
| 202552_s_at | CRIM1    | cysteine rich transmembrane BMP regulator 1 (chordin-like)                                                                                                                                                        |
| 202566_s_at | SVIL     | supervillin                                                                                                                                                                                                       |
| 202607_at   | NDST1    | N-deacetylase/N-sulfotransferase (heparan glucosaminyl) 1                                                                                                                                                         |
| 202679_at   | NPC1     | Niemann-Pick disease, type C1                                                                                                                                                                                     |
| 202822_at   | LPP      | LIM domain containing preferred translocation partner in lipoma                                                                                                                                                   |
| 203104_at   | CSF1R    | colony stimulating factor 1 receptor, formerly McDonough feline sarcoma viral (v-fms) oncogene homolog /// colony stimulating factor 1 receptor, formerly McDonough feline sarcoma viral (v-fms) oncogene homolog |
| 203504_s_at | ABCA1    | ATP-binding cassette, sub-family A (ABC1), member 1                                                                                                                                                               |
| 203505_at   | ABCA1    | ATP-binding cassette, sub-family A (ABC1), member 1                                                                                                                                                               |
| 204036_at   | EDG2     | endothelial differentiation, lysophosphatidic acid G-protein-coupled receptor, 2                                                                                                                                  |
| 204425_at   | ARHGAP4  | Rho GTPase activating protein 4                                                                                                                                                                                   |
| 204489_s_at | CD44     | CD44 molecule (Indian blood group)                                                                                                                                                                                |
| 204647_at   | HOMER3   | homer homolog 3 (Drosophila)                                                                                                                                                                                      |
| 204676_at   | C16ORF51 | chromosome 16 open reading frame 51                                                                                                                                                                               |
| 204688_at   | SGCE     | sarcoglycan, epsilon                                                                                                                                                                                              |
| 204805_s_at | H1FX     | H1 histone family, member X                                                                                                                                                                                       |
| 205129_at   | NPM3     | nucleophosmin/nucleoplasmin, 3                                                                                                                                                                                    |
| 205743_at   | STAC     | SH3 and cysteine rich domain                                                                                                                                                                                      |

|             |                        |                                                                                                  |
|-------------|------------------------|--------------------------------------------------------------------------------------------------|
| 205811_at   | POLG2                  | polymerase (DNA directed), gamma 2, accessory subunit                                            |
| 206116_s_at | TPM1                   | tropomyosin 1 (alpha)                                                                            |
| 207357_s_at | GALNT10                | UDP-N-acetyl-alpha-D-galactosamine:polypeptide N-acetylgalactosaminyltransferase 10 (GalNAc-T10) |
| 208711_s_at | CCND1                  | cyclin D1                                                                                        |
| 208773_s_at | ANKHD1 ///<br>MASK-BP3 | ankyrin repeat and KH domain containing 1 /// MASK-4E-BP3 alternate reading frame gene           |
| 208924_at   | RNF11                  | ring finger protein 11                                                                           |
| 208944_at   | TGFBR2                 | transforming growth factor, beta receptor II (70/80kDa)                                          |
| 208955_at   | DUT                    | dUTP pyrophosphatase                                                                             |
| 209143_s_at | CLNS1A ///<br>CLDND1   | chloride channel, nucleotide-sensitive, 1A /// claudin domain containing 1                       |
| 209214_s_at | EWSR1                  | Ewing sarcoma breakpoint region 1                                                                |
| 209528_s_at | TELO2                  | TEL2, telomere maintenance 2, homolog (S. cerevisiae)                                            |
| 209834_at   | CHST3                  | carbohydrate (chondroitin 6) sulfotransferase 3                                                  |
| 209835_x_at | CD44                   | CD44 molecule (Indian blood group)                                                               |
| 209897_s_at | SLIT2                  | slit homolog 2 (Drosophila)                                                                      |
| 209946_at   | VEGFC                  | vascular endothelial growth factor C                                                             |
| 210138_at   | RGS20                  | regulator of G-protein signalling 20                                                             |
| 210416_s_at | CHEK2                  | CHK2 checkpoint homolog (S. pombe)                                                               |
| 210445_at   | FABP6                  | fatty acid binding protein 6, ileal (gastrotropin)                                               |
| 210764_s_at | CYR61                  | cysteine-rich, angiogenic inducer, 61                                                            |
| 210916_s_at | CD44                   | CD44 molecule (Indian blood group)                                                               |
| 210986_s_at | TPM1                   | tropomyosin 1 (alpha)                                                                            |
| 210987_x_at | TPM1                   | tropomyosin 1 (alpha)                                                                            |
| 211510_s_at | CRHR2                  | corticotropin releasing hormone receptor 2                                                       |
| 211612_s_at | IL13RA1                | interleukin 13 receptor, alpha 1 /// interleukin 13 receptor, alpha 1                            |

|             |                           |                                                                                                                                   |
|-------------|---------------------------|-----------------------------------------------------------------------------------------------------------------------------------|
| 211668_s_at | PLAU                      | plasminogen activator, urokinase /// plasminogen activator, urokinase                                                             |
| 211926_s_at | MYH9                      | myosin, heavy polypeptide 9, non-muscle                                                                                           |
| 211971_s_at | LRPPRC                    | leucine-rich PPR-motif containing                                                                                                 |
| 212014_x_at | CD44                      | CD44 molecule (Indian blood group)                                                                                                |
| 212061_at   | SR140                     | U2-associated SR140 protein                                                                                                       |
| 212298_at   | NRP1                      | neuropilin 1                                                                                                                      |
| 212315_s_at | NUP210                    | nucleoporin 210kDa                                                                                                                |
| 212316_at   | NUP210                    | nucleoporin 210kDa                                                                                                                |
| 212656_at   | TSMF                      | Ts translation elongation factor, mitochondrial                                                                                   |
| 212714_at   | LARP4                     | La ribonucleoprotein domain family, member 4                                                                                      |
| 212962_at   | SYDE1                     | synapse defective 1, Rho GTPase, homolog 1 (C. elegans)                                                                           |
| 213798_s_at | CAP1                      | CAP, adenylate cyclase-associated protein 1 (yeast)                                                                               |
| 213947_s_at | NUP210                    | nucleoporin 210kDa                                                                                                                |
| 214030_at   | DKFZP667G211<br>0         | hypothetical protein DKFZp667G2110                                                                                                |
| 214060_at   | SSBP1                     | single-stranded DNA binding protein 1                                                                                             |
| 214752_x_at | FLNA                      | filamin A, alpha (actin binding protein 280)                                                                                      |
| 214882_s_at | SFRS2                     | splicing factor, arginine/serine-rich 2                                                                                           |
| 215068_s_at | FBXL18                    | F-box and leucine-rich repeat protein 18                                                                                          |
| 215489_x_at | HOMER3                    | homer homolog 3 (Drosophila)                                                                                                      |
| 215501_s_at | DUSP10                    | dual specificity phosphatase 10                                                                                                   |
| 216515_x_at | PTMA ///<br>LOC643287     | prothymosin, alpha (gene sequence 28) /// similar to prothymosin, alpha (gene sequence 28)                                        |
| 216538_at   | EXOC4                     | Exocyst complex component 4                                                                                                       |
| 216580_at   | RPL7 ///<br>LOC389305 /// | ribosomal protein L7 /// similar to 60S ribosomal protein L7 /// similar to 60S ribosomal protein L7 /// similar to 60S ribosomal |

|             |                                                                                                                 |                                                                                                                                                                      |
|-------------|-----------------------------------------------------------------------------------------------------------------|----------------------------------------------------------------------------------------------------------------------------------------------------------------------|
|             | LOC641750 ///<br>LOC643906 ///<br>LOC645737 ///<br>LOC648000 ///<br>LOC649312 ///<br>LOC653702 ///<br>LOC653949 | protein L7 /// 60S ribosomal protein L7-like /// similar to 60S ribosomal protein L7 /// similar to 60S ribosomal protein L7 /// similar to 60S ribosomal protein L7 |
| 216908_x_at | LOC94431                                                                                                        | RNA polymerase I transcription factor RRN3-like                                                                                                                      |
| 217166_at   | ---                                                                                                             | ---                                                                                                                                                                  |
| 217340_at   | LOC645452 ///<br>LOC650644                                                                                      | similar to 60S ribosomal protein L21 /// similar to 60S ribosomal protein L21                                                                                        |
| 217763_s_at | RAB31                                                                                                           | RAB31, member RAS oncogene family                                                                                                                                    |
| 217863_at   | PIAS1                                                                                                           | protein inhibitor of activated STAT, 1                                                                                                                               |
| 217915_s_at | C15ORF15                                                                                                        | chromosome 15 open reading frame 15                                                                                                                                  |
| 217993_s_at | MAT2B                                                                                                           | methionine adenosyltransferase II, beta                                                                                                                              |
| 218088_s_at | RRAGC                                                                                                           | Ras-related GTP binding C                                                                                                                                            |
| 218456_at   | C1QDC1                                                                                                          | C1q domain containing 1                                                                                                                                              |
| 218656_s_at | LHFP                                                                                                            | lipoma HMGIC fusion partner                                                                                                                                          |
| 218718_at   | PDGFC                                                                                                           | platelet derived growth factor C                                                                                                                                     |
| 218768_at   | NUP107                                                                                                          | nucleoporin 107kDa                                                                                                                                                   |
| 218880_at   | FOSL2                                                                                                           | FOS-like antigen 2                                                                                                                                                   |
| 218980_at   | FHOD3                                                                                                           | formin homology 2 domain containing 3                                                                                                                                |
| 219713_at   | CARKL                                                                                                           | carbohydrate kinase-like                                                                                                                                             |
| 219733_s_at | SLC27A5                                                                                                         | solute carrier family 27 (fatty acid transporter), member 5                                                                                                          |
| 220296_at   | GALNT10                                                                                                         | UDP-N-acetyl-alpha-D-galactosamine:polypeptide N-acetylgalactosaminyltransferase 10 (GalNAc-T10)                                                                     |
| 221224_s_at | DCAKD                                                                                                           | dephospho-CoA kinase domain containing                                                                                                                               |

|             |                         |                                                                                  |
|-------------|-------------------------|----------------------------------------------------------------------------------|
| 221534_at   | C11ORF68                | chromosome 11 open reading frame 68                                              |
| 221563_at   | DUSP10                  | dual specificity phosphatase 10                                                  |
| 221821_s_at | C12ORF41                | chromosome 12 open reading frame 41                                              |
| 221843_s_at | KIAA1609                | KIAA1609                                                                         |
| 222036_s_at | MCM4                    | MCM4 minichromosome maintenance deficient 4 (S. cerevisiae)                      |
| 222040_at   | HNRPA1 ///<br>LOC644245 | heterogeneous nuclear ribonucleoprotein A1 /// hypothetical<br>protein LOC644245 |
| 222222_s_at | HOMER3                  | homer homolog 3 (Drosophila)                                                     |
| 222297_x_at | RPL18                   | Ribosomal protein L18                                                            |
| 31874_at    | GAS2L1                  | growth arrest-specific 2 like 1                                                  |
| 32094_at    | CHST3                   | carbohydrate (chondroitin 6) sulfotransferase 3                                  |

Supplementary Table 3. PDCCE Tumor Growth Inhibition Over Time

|                  | <b>Days</b> |          |          |           |           |
|------------------|-------------|----------|----------|-----------|-----------|
| <b>Sample ID</b> | <b>0</b>    | <b>2</b> | <b>7</b> | <b>14</b> | <b>16</b> |
| CRC007           | -0.142      | 0.183    | 0.820    | 0.916     | 0.907     |
| CRC010           | -0.260      | 0.035    | 0.483    | 0.858     | 0.875     |
| CRC012           | -0.689      | 0.049    | -0.108   | 0.346     | 0.486     |
| CRC025           | -0.037      | 0.246    | 0.481    | 0.896     | 0.969     |
| CRC028           | -0.091      | 0.280    | 0.745    | 0.847     | 0.907     |
| CRC034           | 0.035       | -0.186   | -0.053   | 0.391     | 0.559     |
| CRC039           | -0.059      | 0.128    | 0.542    | 0.397     | 0.159     |
| CRC054           | 0.131       | 0.088    | 0.413    | 0.184     | 0.546     |
| CRC057           | -0.116      | -0.519   | 0.544    | 0.944     | 0.943     |
| CRC059           | -0.070      | -0.162   | -0.101   | 0.150     | 0.214     |
| CRC067           | 0.073       | 0.291    | 0.738    | 0.523     | 0.578     |
| CRC075           | -0.404      | 0.336    | 0.519    | 0.764     | 0.695     |
| CRC102           | -0.130      | --       | 0.549    | 0.767     | 0.858     |
| CRC105           | 0.152       | 0.378    | 0.509    | 0.619     | 0.611     |

Supplementary Table 4. List of FFPE PDCCEs with Corresponding Class and Predicted Response

| <b>Mouse Explant</b> | <b>Tumor Growth Inhibition</b> | <b>Identified Classification<sup>a</sup></b> | <b>Oxaliplatin Predicted Probability</b> | <b>Predicted Response<sup>b</sup></b> |
|----------------------|--------------------------------|----------------------------------------------|------------------------------------------|---------------------------------------|
| CRC007               | 0.907                          | Sensitive                                    | 0.761                                    | Respond                               |
| CRC010               | 0.875                          | Sensitive                                    | 0.266                                    | Non-respond                           |
| CRC012               | 0.486                          | Resistant                                    | 0.291                                    | Non-respond                           |
| CRC025               | 0.969                          | Sensitive                                    | 0.553                                    | Respond                               |
| CRC028               | 0.907                          | Sensitive                                    | 0.677                                    | Respond                               |
| CRC034               | 0.559                          | Resistant                                    | 0.390                                    | Non-respond                           |
| CRC039               | 0.159                          | Resistant                                    | 0.288                                    | Non-respond                           |
| CRC054               | 0.546                          | Resistant                                    | 0.421                                    | Non-respond                           |
| CRC057 <sup>c</sup>  | --                             | --                                           | --                                       | --                                    |
| CRC059               | 0.214                          | Resistant                                    | 0.326                                    | Non-respond                           |
| CRC067               | 0.578                          | Resistant                                    | 0.607                                    | Respond                               |
| CRC075               | 0.694                          | Sensitive                                    | 0.697                                    | Respond                               |
| CRC102               | 0.858                          | Sensitive                                    | 0.881                                    | Respond                               |
| CRC105               | 0.611                          | Resistant                                    | 0.374                                    | Non-respond                           |

<sup>a</sup>Each sample was identified as either resistant or sensitive to oxaliplatin based on the TGI cutoff of 0.643.

<sup>b</sup>Predicted response to oxaliplatin was determined by the oxaliplatin predicted probability cutoff of 0.5.

<sup>c</sup>CRC057 was removed for quality control reasons as discussed in the manuscript.
